# Supplementary material
Source: ML conference proceedings conference paper supplement (https://aclanthology.org/2020.acl-main.109)
Supplement: Dataset [file 2020.acl-main.109.Dataset.zip]

## A Glossary of UD POS tags and edge types

A glossary of UD POS labels and edge types mentioned in the paper is provided in Table 1.

## B Distinguishing Content and Function Words

We adopt the following distinction between function and content words. Function words include (1) grammatical-relation markers (prepositions marking direct and indirect objects, possession, and other types of relations inside NPs); (2) tense-aspect-mood markers including inflected auxiliaries; (3) markers of (in)definiteness; (4) coordinating conjunctions; (5) complementizers; (6) classifiers; (7) copulas and existential predicates; (8) dummy subjects and expletives. Other word types are considered content words, including (1) all other types of predicates, participants, obliques, adverbial and adjectival modifiers; (2) negation markers; (3) discourse markers; (4) quantifiers; (5) spatial/temporal-relations markers.

## C Confusion matrices for translation equivalents of POS tags and UD edge labels: raw counts

### C.1 POS tags

Raw-count and percentage confusion matrices for translation equivalents of UD POS tags in three parallel corpora are presnted in Tables 2 and 3.

### C.2 UD edge types

Raw-count confusion matrices for translation equivalents of major UD edge types in three parallel corpora are presnted in Table 4.

## D Translation entropies of UD relations

Translation entropies of UD relations are shown in Table 5.

## E Zero-shot Parsing: Implementation Details

We used the AllenNLP (Gardner et al., 2018) implementation of the deep biaffine attention model by Dozat and Manning (2017). The only modification is that we replaced the trainable Glove embeddings with multilingual Bert (Devlin et al., 2018) untrainable embeddings (i.e., we didn't perform any fine-tuning on Bert), using the built-in embeddings in AllenNLP with the default settings. We

ignore UD sub-categorization of the edge labels (as the sub-types are often language-specific). The full list of hyper-parameters is given in Table 6.

We trained three models for each language (with the same hyperparameters), using the UD v2.5 English-EWT dataset for the English model, and the GSD datasets (also v2.5) for French, Russian, Chinese, Korean and Japanese. Standard splits were used for all corpora.<sup>1</sup> The models were evaluated on the GSD and PUD datasets.

The per-label F-scores used for linear modelling in the paper are averages of the F-scores of the three models. The following relations were considered: `acl`, `advcl`, `advmod`, `amod`, `appos`, `ccomp`, `compound`, `conj`, `fixed`, `flat`, `nmod`, `nsubj`, `nummod`, `obj`, `obl`, `parataxis`, `xcomp`.<sup>2</sup> Not all of them were present in parser outputs for all languages due to training-set peculiarities, and missing relations were automatically omitted from the model. The R code used for fitting the models is available in the Supplementary Material.

## References

- Jacob Devlin, Ming-Wei Chang, Kenton Lee, and Kristina Toutanova. 2018. Bert: Pre-training of deep bidirectional transformers for language understanding. *arXiv preprint arXiv:1810.04805*.
- Timothy Dozat and Christopher D. Manning. 2017. Deep biaffine attention for dependency parsing. In *ICLR 2017*.
- Matt Gardner, Joel Grus, Mark Neumann, Oyvind Tafjord, Pradeep Dasigi, Nelson F. Liu, Matthew Peters, Michael Schmitz, and Luke Zettlemoyer. 2018. AllenNLP: A deep semantic natural language processing platform. In *Proceedings of Workshop for NLP Open Source Software (NLP-OSS)*, pages 1–6, Melbourne, Australia. Association for Computational Linguistics.
- Diederik P Kingma and Jimmy Ba. 2014. Adam: A method for stochastic optimization. In *Proc. of ICLR*.

<sup>1</sup>All UD corpora can be found in <https://github.com/UniversalDependencies/>

<sup>2</sup>The list is slightly longer than that used in the automation experiments since thanks to the precision of manual alignment we were able to target relatively rare edge labels in a small corpus.

| Label                       | Short Definition                                                                                                                          |
|-----------------------------|-------------------------------------------------------------------------------------------------------------------------------------------|
| <b>POS tags</b>             |                                                                                                                                           |
| <i>NOUN</i>                 | Noun.                                                                                                                                     |
| <i>PROPN</i>                | Proper noun.                                                                                                                              |
| <i>PRON</i>                 | Pronoun.                                                                                                                                  |
| <i>ADJ</i>                  | Adjective.                                                                                                                                |
| <i>ADV</i>                  | Adverb.                                                                                                                                   |
| <i>VERB</i>                 | Verb.                                                                                                                                     |
| <i>AUX</i>                  | Auxiliary.                                                                                                                                |
| <i>PART</i>                 | Particle.                                                                                                                                 |
| <i>NUM</i>                  | Numeral.                                                                                                                                  |
| <i>ADP</i>                  | Adposition.                                                                                                                               |
| <b>Clause Elements</b>      |                                                                                                                                           |
| <i>nsubj</i>                | Nominal subject.                                                                                                                          |
| <i>dobj</i>                 | Direct object.                                                                                                                            |
| <i>ccomp</i>                | Clausal complement (finite or infinite), unless its subject is controlled.                                                                |
| <i>xcomp</i>                | Open clausal complement, i.e., predicative or clausal complement without its own subject.                                                 |
| <i>advmod</i>               | Modifying adverb.                                                                                                                         |
| <i>neg</i>                  | Negation modifier (e.g., “not”, “no”).                                                                                                    |
| <i>aux</i>                  | Auxiliary of a verbal predicate, including markers of tense, mood, modality, aspect, voice or evidentiality.                              |
| <i>nmod</i>                 | Oblique: nominal functioning as an adjunct. ( <i>nmods</i> are also used for nominal modifiers in noun phrases, see below)                |
| <b>Inter-clause Linkage</b> |                                                                                                                                           |
| <i>conj</i>                 | Relation between the conjuncts in a coordination to the first conjunct, which is considered the head.                                     |
| <i>cc</i>                   | Coordinating conjunction.                                                                                                                 |
| <i>advcl</i>                | Adverbial clause modifier, including temporal clause, consequence, conditional clause, and purpose clause.                                |
| <i>mark</i>                 | Marker: the word introducing a clause subordinate to another clause, often a subordinating conjunction.                                   |
| <i>parataxis</i>            | Several elements (often clauses or fragments) placed side by side without any explicit coordination, subordination, or argument relation. |
| <b>Nominal Elements</b>     |                                                                                                                                           |
| <i>det</i>                  | Determiner.                                                                                                                               |
| <i>case</i>                 | Case marker, including adpositions.                                                                                                       |
| <i>nmod</i>                 | Nominal modifier of a noun or a noun phrase.                                                                                              |
| <i>nummod</i>               | Numeric modifier.                                                                                                                         |

Table 1: UD POS tags and edge types mentioned in the paper and their definitions.

| En-Ru |       | ADJ  | ADP | ADV | AUX | CCONJ | DET | NOUN | NUM | None | PART | PRON | PROPN | SCONJ | SYM | VERB | X   |
|-------|-------|------|-----|-----|-----|-------|-----|------|-----|------|------|------|-------|-------|-----|------|-----|
|       | ADJ   | 1030 | 1   | 52  | 0   | 0     | 28  | 74   | 2   | 29   | 2    | 0    | 22    | 0     | 0   | 57   | 7   |
|       | ADP   | 4    | 296 | 11  | 0   | 0     | 2   | 12   | 0   | 9    | 1    | 0    | 0     | 1     | 0   | 7    | 3   |
|       | ADV   | 31   | 10  | 362 | 0   | 25    | 5   | 17   | 2   | 31   | 28   | 1    | 1     | 0     | 0   | 6    | 12  |
|       | AUX   | 7    | 0   | 2   | 5   | 0     | 0   | 1    | 0   | 3    | 0    | 0    | 0     | 0     | 0   | 80   | 0   |
|       | CCONJ | 0    | 0   | 0   | 0   | 25    | 0   | 0    | 0   | 2    | 0    | 0    | 0     | 0     | 0   | 0    | 0   |
|       | DET   | 31   | 1   | 3   | 0   | 0     | 29  | 3    | 9   | 4    | 8    | 1    | 0     | 0     | 0   | 1    | 0   |
|       | INTJ  | 0    | 0   | 0   | 0   | 0     | 0   | 0    | 0   | 0    | 0    | 0    | 0     | 0     | 0   | 0    | 1   |
|       | NOUN  | 204  | 3   | 23  | 0   | 0     | 14  | 3013 | 4   | 59   | 0    | 8    | 116   | 0     | 5   | 38   | 12  |
|       | NUM   | 20   | 0   | 1   | 0   | 0     | 1   | 23   | 229 | 2    | 0    | 1    | 0     | 0     | 0   | 0    | 4   |
|       | None  | 102  | 44  | 90  | 1   | 10    | 38  | 387  | 6   | 0    | 27   | 61   | 32    | 1     | 0   | 177  | 14  |
|       | PART  | 0    | 1   | 1   | 0   | 0     | 0   | 0    | 0   | 0    | 45   | 0    | 0     | 0     | 0   | 3    | 0   |
|       | PRON  | 5    | 0   | 2   | 0   | 0     | 127 | 13   | 0   | 22   | 0    | 348  | 1     | 0     | 0   | 1    | 0   |
|       | PROPN | 144  | 0   | 0   | 0   | 0     | 3   | 124  | 0   | 9    | 0    | 0    | 1247  | 0     | 0   | 2    | 10  |
|       | SCONJ | 0    | 13  | 3   | 0   | 0     | 0   | 0    | 0   | 0    | 3    | 0    | 0     | 0     | 0   | 0    | 0   |
|       | SYM   | 0    | 0   | 0   | 0   | 0     | 0   | 2    | 0   | 0    | 0    | 0    | 0     | 0     | 15  | 0    | 0   |
|       | VERB  | 52   | 7   | 9   | 9   | 0     | 0   | 145  | 0   | 66   | 0    | 1    | 2     | 0     | 0   | 1444 | 0   |
|       | X     | 2    | 0   | 0   | 0   | 0     | 0   | 2    | 0   | 0    | 0    | 0    | 6     | 0     | 0   | 0    | 0   |
| En-Fr |       |      |     |     |     |       |     |      |     |      |      |      |       |       |     |      |     |
|       | ADJ   | 1006 | 12  | 51  | 0   | 0     | 2   | 126  | 1   | 44   | 0    | 0    | 12    | 0     | 0   | 45   | 2   |
|       | ADP   | 5    | 388 | 21  | 0   | 1     | 4   | 13   | 0   | 9    | 0    | 0    | 0     | 1     | 0   | 7    | 0   |
|       | ADV   | 30   | 28  | 416 | 1   | 5     | 2   | 33   | 0   | 43   | 0    | 5    | 0     | 5     | 0   | 7    | 0   |
|       | AUX   | 0    | 0   | 2   | 4   | 0     | 0   | 0    | 0   | 2    | 0    | 0    | 0     | 0     | 0   | 74   | 0   |
|       | CCONJ | 0    | 1   | 12  | 0   | 482   | 0   | 0    | 0   | 29   | 0    | 0    | 0     | 0     | 1   | 0    | 0   |
|       | DET   | 25   | 2   | 4   | 0   | 0     | 19  | 4    | 5   | 5    | 0    | 2    | 0     | 0     | 0   | 0    | 0   |
|       | INTJ  | 0    | 0   | 0   | 0   | 0     | 0   | 0    | 0   | 0    | 0    | 0    | 0     | 0     | 0   | 1    | 0   |
|       | NOUN  | 113  | 9   | 9   | 0   | 0     | 1   | 3244 | 10  | 46   | 0    | 10   | 13    | 0     | 5   | 38   | 1   |
|       | NUM   | 8    | 0   | 0   | 0   | 0     | 11  | 18   | 371 | 1    | 0    | 1    | 0     | 0     | 0   | 0    | 0   |
|       | None  | 55   | 28  | 70  | 3   | 52    | 5   | 162  | 3   | 0    | 0    | 57   | 3     | 0     | 0   | 170  | 2   |
|       | PART  | 0    | 1   | 2   | 0   | 0     | 0   | 0    | 0   | 0    | 0    | 0    | 0     | 0     | 0   | 0    | 0   |
|       | PRON  | 0    | 1   | 1   | 0   | 0     | 0   | 16   | 0   | 9    | 0    | 409  | 1     | 0     | 0   | 1    | 0   |
|       | PROPN | 70   | 4   | 0   | 0   | 0     | 0   | 380  | 4   | 11   | 0    | 4    | 1006  | 0     | 0   | 1    | 21  |
|       | SCONJ | 0    | 62  | 34  | 0   | 6     | 1   | 1    | 0   | 0    | 0    | 0    | 0     | 2     | 0   | 0    | 0   |
|       | SYM   | 0    | 0   | 0   | 0   | 0     | 0   | 9    | 0   | 0    | 0    | 0    | 0     | 0     | 26  | 0    | 0   |
|       | VERB  | 63   | 19  | 2   | 36  | 0     | 0   | 100  | 0   | 49   | 0    | 1    | 1     | 0     | 0   | 1508 | 0   |
|       | X     | 1    | 0   | 0   | 0   | 0     | 0   | 3    | 0   | 0    | 0    | 0    | 1     | 0     | 0   | 0    | 6   |
| En-Zh |       |      |     |     |     |       |     |      |     |      |      |      |       |       |     |      |     |
|       | ADJ   | 337  | 6   | 30  | 9   | 0     | 42  | 373  | 66  | 13   | 0    | 6    | 131   | 0     | 0   | 98   | 2   |
|       | ADP   | 5    | 227 | 3   | 0   | 6     | 2   | 18   | 0   | 34   | 2    | 0    | 0     | 0     | 1   | 117  | 0   |
|       | ADV   | 46   | 20  | 338 | 9   | 1     | 2   | 79   | 3   | 33   | 0    | 12   | 0     | 0     | 2   | 42   | 1   |
|       | AUX   | 0    | 0   | 2   | 50  | 0     | 0   | 2    | 0   | 6    | 0    | 0    | 0     | 0     | 0   | 11   | 0   |
|       | CCONJ | 0    | 4   | 135 | 2   | 243   | 0   | 1    | 0   | 51   | 0    | 0    | 0     | 0     | 2   | 1    | 1   |
|       | DET   | 7    | 0   | 7   | 4   | 0     | 36  | 4    | 6   | 1    | 0    | 3    | 0     | 0     | 0   | 9    | 0   |
|       | INTJ  | 0    | 0   | 0   | 0   | 0     | 0   | 0    | 0   | 0    | 0    | 0    | 0     | 0     | 0   | 0    | 1   |
|       | NOUN  | 54   | 7   | 4   | 3   | 0     | 7   | 2671 | 16  | 38   | 4    | 4    | 5     | 0     | 0   | 356  | 10  |
|       | NUM   | 2    | 0   | 0   | 0   | 0     | 2   | 2    | 194 | 1    | 0    | 0    | 9     | 0     | 0   | 0    | 0   |
|       | None  | 49   | 130 | 462 | 48  | 15    | 21  | 559  | 31  | 0    | 11   | 100  | 39    | 1     | 4   | 464  | 23  |
|       | PART  | 0    | 4   | 22  | 9   | 0     | 0   | 0    | 0   | 0    | 0    | 0    | 0     | 0     | 0   | 13   | 0   |
|       | PRON  | 1    | 0   | 1   | 0   | 0     | 7   | 29   | 0   | 54   | 0    | 526  | 5     | 0     | 0   | 2    | 2   |
|       | PROPN | 6    | 0   | 0   | 0   | 0     | 0   | 192  | 2   | 7    | 2    | 5    | 1001  | 0     | 0   | 11   | 126 |
|       | PUNCT | 0    | 0   | 0   | 0   | 1     | 0   | 0    | 0   | 0    | 0    | 0    | 0     | 0     | 0   | 0    | 0   |
|       | SCONJ | 1    | 56  | 7   | 2   | 0     | 0   | 3    | 0   | 6    | 0    | 0    | 0     | 0     | 8   | 14   | 1   |
|       | SYM   | 0    | 0   | 0   | 0   | 1     | 0   | 2    | 0   | 1    | 0    | 0    | 0     | 0     | 0   | 0    | 0   |
|       | VERB  | 32   | 14  | 25  | 25  | 0     | 2   | 110  | 0   | 54   | 1    | 0    | 0     | 1     | 0   | 1394 | 2   |
|       | X     | 1    | 0   | 0   | 0   | 0     | 0   | 3    | 0   | 0    | 0    | 1    | 0     | 0     | 0   | 0    | 5   |
| En-Ko |       |      |     |     |     |       |     |      |     |      |      |      |       |       |     |      |     |
|       | ADJ   | 152  | 0   | 37  | 0   | 0     | 42  | 554  | 20  | 14   | 2    | 4    | 128   | 0     | 0   | 31   | 0   |
|       | ADP   | 10   | 0   | 13  | 0   | 0     | 0   | 100  | 0   | 68   | 6    | 1    | 0     | 0     | 0   | 27   | 0   |
|       | ADV   | 46   | 0   | 202 | 1   | 17    | 6   | 125  | 1   | 28   | 8    | 5    | 2     | 0     | 0   | 21   | 0   |
|       | AUX   | 7    | 0   | 0   | 23  | 0     | 0   | 6    | 0   | 9    | 1    | 0    | 0     | 0     | 0   | 11   | 0   |
|       | CCONJ | 2    | 0   | 0   | 0   | 19    | 0   | 2    | 0   | 0    | 0    | 0    | 1     | 0     | 0   | 1    | 0   |
|       | DET   | 5    | 0   | 7   | 0   | 0     | 49  | 13   | 0   | 5    | 2    | 2    | 0     | 0     | 0   | 5    | 0   |
|       | INTJ  | 0    | 0   | 0   | 0   | 0     | 0   | 0    | 0   | 0    | 0    | 0    | 0     | 0     | 0   | 0    | 1   |
|       | NOUN  | 10   | 0   | 13  | 6   | 0     | 8   | 2628 | 4   | 39   | 2    | 8    | 29    | 0     | 0   | 46   | 0   |
|       | NUM   | 0    | 0   | 1   | 0   | 0     | 45  | 21   | 147 | 1    | 0    | 0    | 1     | 0     | 0   | 0    | 0   |
|       | None  | 0    | 0   | 0   | 0   | 0     | 0   | 3    | 1   | 0    | 0    | 0    | 0     | 0     | 0   | 0    | 0   |
|       | PART  | 11   | 0   | 2   | 0   | 0     | 0   | 0    | 0   | 2    | 2    | 0    | 0     | 0     | 0   | 26   | 0   |
|       | PRON  | 3    | 0   | 0   | 1   | 0     | 18  | 17   | 0   | 50   | 0    | 232  | 6     | 0     | 0   | 0    | 0   |
|       | PROPN | 0    | 0   | 0   | 1   | 0     | 0   | 181  | 7   | 10   | 0    | 0    | 1002  | 0     | 0   | 0    | 0   |
|       | SCONJ | 0    | 0   | 1   | 0   | 0     | 0   | 14   | 0   | 0    | 1    | 0    | 1     | 0     | 0   | 9    | 0   |
|       | SYM   | 0    | 0   | 0   | 0   | 0     | 0   | 27   | 0   | 0    | 0    | 0    | 0     | 0     | 0   | 0    | 0   |
|       | VERB  | 32   | 0   | 12  | 5   | 0     | 1   | 804  | 0   | 39   | 30   | 0    | 5     | 0     | 0   | 400  | 0   |
|       | X     | 0    | 0   | 0   | 0   | 0     | 0   | 4    | 0   | 0    | 1    | 0    | 2     | 0     | 0   | 0    | 0   |
| En-Jp |       |      |     |     |     |       |     |      |     |      |      |      |       |       |     |      |     |
|       | ADJ   | 101  | 3   | 10  | 2   | 0     | 0   | 185  | 5   | 7    | 0    | 1    | 32    | 0     | 0   | 18   | 0   |
|       | ADP   | 1    | 425 | 1   | 6   | 0     | 0   | 32   | 0   | 5    | 1    | 0    | 1     | 3     | 0   | 8    | 0   |
|       | ADV   | 21   | 22  | 43  | 3   | 16    | 0   | 43   | 0   | 17   | 6    | 3    | 0     | 4     | 0   | 7    | 0   |
|       | AUX   | 1    | 7   | 0   | 99  | 0     | 0   | 5    | 0   | 0    | 1    | 0    | 0     | 1     | 0   | 29   | 0   |
|       | CCONJ | 0    | 70  | 1   | 18  | 36    | 0   | 0    | 0   | 0    | 0    | 0    | 0     | 17    | 1   | 0    | 0   |
|       | DET   | 4    | 52  | 2   | 2   | 0     | 47  | 12   | 0   | 4    | 0    | 7    | 1     | 0     | 0   | 0    | 0   |
|       | INTJ  | 0    | 0   | 0   | 0   | 0     | 0   | 1    | 0   | 0    | 0    | 0    | 0     | 0     | 0   | 0    | 0   |
|       | NOUN  | 8    | 0   | 0   | 0   | 0     | 0   | 1271 | 0   | 24   | 5    | 1    | 18    | 1     | 0   | 27   | 0   |
|       | NUM   | 0    | 0   | 0   | 0   | 0     | 0   | 5    | 71  | 0    | 0    | 0    | 1     | 0     | 0   | 2    | 0   |
|       | PART  | 1    | 53  | 0   | 15  | 0     | 0   | 0    | 0   | 1    | 0    | 0    | 0     | 1     | 0   | 0    | 0   |
|       | PRON  | 0    | 5   | 1   | 1   | 1     | 6   | 11   | 0   | 77   | 1    | 108  | 0     | 6     | 0   | 0    | 0   |
|       | PROPN | 0    | 0   | 0   | 0   | 0     | 0   | 139  | 0   | 1    | 0    | 0    | 406   | 0     | 0   | 0    | 0   |
|       | SCONJ | 0    | 17  | 0   | 1   | 0     | 0   | 6    | 0   | 0    | 3    | 0    | 0     | 14    | 0   | 0    | 0   |
|       | SYM   | 0    | 0   | 0   | 0   | 0     | 0   | 15   | 0   | 0    | 0    | 0    | 0     | 0     | 0   | 0    | 0   |
|       | VERB  | 7    | 4   | 1   | 18  | 0     | 0   | 53   | 0   | 21   | 0    | 0    | 0     | 0     | 0   | 229  | 0   |
|       | X     | 0    | 0   | 0   | 0   | 0     | 0   | 2    | 0   | 0    | 0    | 0    | 0     | 0     | 0   | 0    | 0   |

Table 2: Raw counts of translation mappings of parts of speech.

| En-Ru |    | ADJ | ADP | ADV | AUX | CCONJ | DET | NOUN | NUM | None | PART | PRON | PROPN | SCONJ | SYM | VERB | X   |
|-------|----|-----|-----|-----|-----|-------|-----|------|-----|------|------|------|-------|-------|-----|------|-----|
| ADJ   | 79 | 0   | 4   | 0   | 0   | 0     | 2   | 6    | 0   | 2    | 0    | 0    | 2     | 0     | 0   | 4    | 1   |
| ADP   | 1  | 86  | 3   | 0   | 0   | 0     | 1   | 3    | 0   | 3    | 0    | 0    | 0     | 0     | 0   | 2    | 1   |
| ADV   | 6  | 2   | 68  | 0   | 5   | 0     | 1   | 3    | 0   | 6    | 5    | 0    | 0     | 0     | 0   | 1    | 2   |
| AUX   | 7  | 0   | 2   | 5   | 0   | 0     | 0   | 1    | 0   | 3    | 0    | 0    | 0     | 0     | 0   | 82   | 0   |
| CCONJ | 0  | 0   | 0   | 0   | 93  | 0     | 0   | 0    | 0   | 7    | 0    | 0    | 0     | 0     | 0   | 0    | 0   |
| DET   | 34 | 1   | 3   | 0   | 0   | 0     | 32  | 3    | 10  | 4    | 9    | 1    | 0     | 0     | 0   | 1    | 0   |
| INTJ  | 0  | 0   | 0   | 0   | 0   | 0     | 0   | 0    | 0   | 0    | 0    | 0    | 0     | 0     | 0   | 0    | 100 |
| NOUN  | 6  | 0   | 1   | 0   | 0   | 0     | 0   | 86   | 0   | 2    | 0    | 0    | 3     | 0     | 0   | 1    | 0   |
| NUM   | 7  | 0   | 0   | 0   | 0   | 0     | 0   | 8    | 81  | 1    | 0    | 0    | 0     | 0     | 0   | 0    | 1   |
| None  | 10 | 4   | 9   | 0   | 1   | 4     | 39  | 1    | 0   | 3    | 6    | 3    | 0     | 0     | 0   | 18   | 1   |
| PART  | 0  | 2   | 2   | 0   | 0   | 0     | 0   | 0    | 0   | 90   | 0    | 0    | 0     | 0     | 0   | 6    | 0   |
| PRON  | 1  | 0   | 0   | 0   | 0   | 24    | 3   | 0    | 4   | 0    | 67   | 0    | 0     | 0     | 0   | 0    | 0   |
| PROPN | 9  | 0   | 0   | 0   | 0   | 0     | 8   | 0    | 1   | 0    | 0    | 81   | 0     | 0     | 0   | 0    | 1   |
| SCONJ | 0  | 68  | 16  | 0   | 0   | 0     | 0   | 0    | 0   | 16   | 0    | 0    | 0     | 0     | 0   | 0    | 0   |
| SYM   | 0  | 0   | 0   | 0   | 0   | 0     | 12  | 0    | 0   | 0    | 0    | 0    | 0     | 0     | 88  | 0    | 0   |
| VERB  | 3  | 0   | 1   | 1   | 0   | 0     | 8   | 0    | 4   | 0    | 0    | 0    | 0     | 0     | 0   | 83   | 0   |
| X     | 20 | 0   | 0   | 0   | 0   | 0     | 0   | 20   | 0   | 0    | 0    | 0    | 60    | 0     | 0   | 0    | 0   |
| En-Fr |    |     |     |     |     |       |     |      |     |      |      |      |       |       |     |      |     |
| ADJ   | 77 | 1   | 4   | 0   | 0   | 0     | 0   | 10   | 0   | 3    | 0    | 0    | 1     | 0     | 0   | 3    | 0   |
| ADP   | 1  | 86  | 5   | 0   | 0   | 0     | 1   | 3    | 0   | 2    | 0    | 0    | 0     | 0     | 0   | 2    | 0   |
| ADV   | 5  | 5   | 72  | 0   | 1   | 0     | 0   | 6    | 0   | 7    | 0    | 1    | 0     | 1     | 0   | 1    | 0   |
| AUX   | 0  | 0   | 2   | 5   | 0   | 0     | 0   | 0    | 0   | 2    | 0    | 0    | 0     | 0     | 0   | 90   | 0   |
| CCONJ | 0  | 0   | 2   | 0   | 92  | 0     | 0   | 0    | 0   | 6    | 0    | 0    | 0     | 0     | 0   | 0    | 0   |
| DET   | 38 | 3   | 6   | 0   | 0   | 29    | 6   | 8    | 8   | 0    | 3    | 0    | 0     | 0     | 0   | 0    | 0   |
| INTJ  | 0  | 0   | 0   | 0   | 0   | 0     | 0   | 0    | 0   | 0    | 0    | 0    | 0     | 0     | 0   | 100  | 0   |
| NOUN  | 3  | 0   | 0   | 0   | 0   | 0     | 0   | 93   | 0   | 1    | 0    | 0    | 0     | 0     | 0   | 1    | 0   |
| NUM   | 2  | 0   | 0   | 0   | 0   | 3     | 4   | 90   | 0   | 0    | 0    | 0    | 0     | 0     | 0   | 0    | 0   |
| None  | 9  | 5   | 11  | 0   | 9   | 1     | 27  | 0    | 0   | 0    | 9    | 0    | 0     | 0     | 0   | 28   | 0   |
| PART  | 0  | 33  | 67  | 0   | 0   | 0     | 0   | 0    | 0   | 0    | 0    | 0    | 0     | 0     | 0   | 0    | 0   |
| PRON  | 0  | 0   | 0   | 0   | 0   | 0     | 4   | 0    | 2   | 0    | 93   | 0    | 0     | 0     | 0   | 0    | 0   |
| PROPN | 5  | 0   | 0   | 0   | 0   | 0     | 25  | 0    | 1   | 0    | 0    | 67   | 0     | 0     | 0   | 0    | 1   |
| SCONJ | 0  | 58  | 32  | 0   | 6   | 1     | 1   | 0    | 0   | 0    | 0    | 0    | 2     | 0     | 0   | 0    | 0   |
| SYM   | 0  | 0   | 0   | 0   | 0   | 0     | 26  | 0    | 0   | 0    | 0    | 0    | 0     | 0     | 74  | 0    | 0   |
| VERB  | 4  | 1   | 0   | 2   | 0   | 0     | 6   | 0    | 3   | 0    | 0    | 0    | 0     | 0     | 0   | 85   | 0   |
| X     | 9  | 0   | 0   | 0   | 0   | 0     | 0   | 27   | 0   | 0    | 0    | 0    | 9     | 0     | 0   | 0    | 55  |
| En-Zh |    |     |     |     |     |       |     |      |     |      |      |      |       |       |     |      |     |
| ADJ   | 30 | 1   | 3   | 1   | 0   | 0     | 4   | 34   | 6   | 1    | 0    | 1    | 12    | 0     | 0   | 9    | 0   |
| ADP   | 1  | 55  | 1   | 0   | 1   | 0     | 4   | 0    | 8   | 0    | 0    | 0    | 0     | 0     | 0   | 28   | 0   |
| ADV   | 8  | 3   | 57  | 2   | 0   | 0     | 13  | 1    | 6   | 0    | 2    | 0    | 0     | 0     | 0   | 7    | 0   |
| AUX   | 0  | 0   | 3   | 70  | 0   | 0     | 3   | 0    | 8   | 0    | 0    | 0    | 0     | 0     | 0   | 15   | 0   |
| CCONJ | 0  | 1   | 31  | 0   | 55  | 0     | 0   | 0    | 12  | 0    | 0    | 0    | 0     | 0     | 0   | 0    | 0   |
| DET   | 9  | 0   | 9   | 5   | 0   | 47    | 5   | 8    | 1   | 0    | 4    | 0    | 0     | 0     | 0   | 12   | 0   |
| INTJ  | 0  | 0   | 0   | 0   | 0   | 0     | 0   | 0    | 0   | 0    | 0    | 0    | 0     | 0     | 0   | 0    | 100 |
| NOUN  | 2  | 0   | 0   | 0   | 0   | 0     | 84  | 1    | 1   | 0    | 0    | 0    | 0     | 0     | 0   | 11   | 0   |
| NUM   | 1  | 0   | 0   | 0   | 0   | 1     | 1   | 92   | 0   | 0    | 0    | 4    | 0     | 0     | 0   | 0    | 0   |
| None  | 3  | 7   | 24  | 2   | 1   | 1     | 29  | 2    | 0   | 1    | 5    | 2    | 0     | 0     | 0   | 24   | 1   |
| PART  | 0  | 8   | 46  | 19  | 0   | 0     | 0   | 0    | 0   | 0    | 0    | 0    | 0     | 0     | 0   | 27   | 0   |
| PRON  | 0  | 0   | 0   | 0   | 0   | 1     | 5   | 0    | 9   | 0    | 84   | 1    | 0     | 0     | 0   | 0    | 0   |
| PROPN | 0  | 0   | 0   | 0   | 0   | 0     | 14  | 0    | 1   | 0    | 0    | 74   | 0     | 0     | 0   | 1    | 9   |
| PUNCT | 0  | 0   | 0   | 0   | 100 | 0     | 0   | 0    | 0   | 0    | 0    | 0    | 0     | 0     | 0   | 0    | 0   |
| SCONJ | 1  | 57  | 7   | 2   | 0   | 0     | 3   | 0    | 6   | 0    | 0    | 0    | 0     | 0     | 8   | 14   | 1   |
| SYM   | 0  | 0   | 0   | 0   | 25  | 0     | 50  | 0    | 25  | 0    | 0    | 0    | 0     | 0     | 0   | 0    | 0   |
| VERB  | 2  | 1   | 2   | 2   | 0   | 0     | 7   | 0    | 3   | 0    | 0    | 0    | 0     | 0     | 0   | 84   | 0   |
| X     | 10 | 0   | 0   | 0   | 0   | 0     | 0   | 30   | 0   | 0    | 0    | 10   | 0     | 0     | 0   | 0    | 50  |
| En-Ko |    |     |     |     |     |       |     |      |     |      |      |      |       |       |     |      |     |
| ADJ   | 15 | 0   | 4   | 0   | 0   | 0     | 4   | 56   | 2   | 1    | 0    | 0    | 13    | 0     | 0   | 3    | 0   |
| ADP   | 4  | 0   | 6   | 0   | 0   | 0     | 44  | 0    | 30  | 3    | 0    | 0    | 0     | 0     | 0   | 12   | 0   |
| ADV   | 10 | 0   | 44  | 0   | 4   | 1     | 27  | 0    | 6   | 2    | 1    | 0    | 0     | 0     | 0   | 5    | 0   |
| AUX   | 12 | 0   | 0   | 40  | 0   | 0     | 11  | 0    | 16  | 2    | 0    | 0    | 0     | 0     | 0   | 19   | 0   |
| CCONJ | 8  | 0   | 0   | 0   | 76  | 0     | 8   | 0    | 0   | 0    | 0    | 4    | 0     | 0     | 0   | 4    | 0   |
| DET   | 6  | 0   | 8   | 0   | 0   | 56    | 15  | 0    | 6   | 2    | 2    | 0    | 0     | 0     | 0   | 6    | 0   |
| INTJ  | 0  | 0   | 0   | 0   | 0   | 0     | 0   | 0    | 0   | 0    | 0    | 0    | 0     | 0     | 0   | 0    | 100 |
| NOUN  | 0  | 0   | 0   | 0   | 0   | 0     | 94  | 0    | 1   | 0    | 0    | 1    | 0     | 0     | 0   | 2    | 0   |
| NUM   | 0  | 0   | 0   | 0   | 0   | 21    | 10  | 68   | 0   | 0    | 0    | 0    | 0     | 0     | 0   | 0    | 0   |
| None  | 0  | 0   | 0   | 0   | 0   | 0     | 75  | 25   | 0   | 0    | 0    | 0    | 0     | 0     | 0   | 0    | 0   |
| PART  | 26 | 0   | 5   | 0   | 0   | 0     | 0   | 0    | 5   | 5    | 0    | 0    | 0     | 0     | 0   | 60   | 0   |
| PRON  | 1  | 0   | 0   | 0   | 0   | 6     | 5   | 0    | 15  | 0    | 71   | 2    | 0     | 0     | 0   | 0    | 0   |
| PROPN | 0  | 0   | 0   | 0   | 0   | 0     | 15  | 1    | 1   | 0    | 0    | 83   | 0     | 0     | 0   | 0    | 0   |
| SCONJ | 0  | 0   | 4   | 0   | 0   | 0     | 54  | 0    | 0   | 4    | 0    | 4    | 0     | 0     | 0   | 35   | 0   |
| SYM   | 0  | 0   | 0   | 0   | 0   | 0     | 100 | 0    | 0   | 0    | 0    | 0    | 0     | 0     | 0   | 0    | 0   |
| VERB  | 2  | 0   | 1   | 0   | 0   | 0     | 61  | 0    | 3   | 2    | 0    | 0    | 0     | 0     | 0   | 30   | 0   |
| X     | 0  | 0   | 0   | 0   | 0   | 0     | 0   | 57   | 0   | 0    | 14   | 0    | 29    | 0     | 0   | 0    | 0   |
| En-Jp |    |     |     |     |     |       |     |      |     |      |      |      |       |       |     |      |     |
| ADJ   | 28 | 1   | 3   | 1   | 0   | 0     | 51  | 1    | 2   | 0    | 0    | 9    | 0     | 0     | 0   | 5    | 0   |
| ADP   | 0  | 88  | 0   | 1   | 0   | 0     | 7   | 0    | 1   | 0    | 0    | 0    | 1     | 0     | 0   | 2    | 0   |
| ADV   | 11 | 12  | 23  | 2   | 9   | 0     | 23  | 0    | 9   | 3    | 2    | 0    | 2     | 0     | 0   | 4    | 0   |
| AUX   | 1  | 5   | 0   | 69  | 0   | 0     | 3   | 0    | 0   | 1    | 0    | 0    | 1     | 0     | 0   | 20   | 0   |
| CCONJ | 0  | 49  | 1   | 13  | 25  | 0     | 0   | 0    | 0   | 0    | 0    | 0    | 12    | 1     | 0   | 0    | 0   |
| DET   | 3  | 40  | 2   | 2   | 0   | 36    | 9   | 0    | 3   | 0    | 5    | 1    | 0     | 0     | 0   | 0    | 0   |
| INTJ  | 0  | 0   | 0   | 0   | 0   | 0     | 100 | 0    | 0   | 0    | 0    | 0    | 0     | 0     | 0   | 0    | 0   |
| NOUN  | 1  | 0   | 0   | 0   | 0   | 0     | 94  | 0    | 2   | 0    | 0    | 1    | 0     | 0     | 0   | 2    | 0   |
| NUM   | 0  | 0   | 0   | 0   | 0   | 0     | 6   | 90   | 0   | 0    | 0    | 1    | 0     | 0     | 0   | 3    | 0   |
| PART  | 1  | 75  | 0   | 21  | 0   | 0     | 0   | 0    | 1   | 0    | 0    | 0    | 1     | 0     | 0   | 0    | 0   |
| PRON  | 0  | 2   | 0   | 0   | 0   | 3     | 5   | 0    | 35  | 0    | 50   | 0    | 3     | 0     | 0   | 0    | 0   |
| PROPN | 0  | 0   | 0   | 0   | 0   | 0     | 25  | 0    | 0   | 0    | 0    | 74   | 0     | 0     | 0   | 0    | 0   |
| SCONJ | 0  | 41  | 0   | 2   | 0   | 0     | 15  | 0    | 0   | 7    | 0    | 0    | 34    | 0     | 0   | 0    | 0   |
| SYM   | 0  | 0   | 0   | 0   | 0   | 0     | 100 | 0    | 0   | 0    | 0    | 0    | 0     | 0     | 0   | 0    | 0   |
| VERB  | 2  | 1   | 0   | 5   | 0   | 0     | 16  | 0    | 6   | 0    | 0    | 0    | 0     | 0     | 0   | 69   | 0   |
| X     | 0  | 0   | 0   | 0   | 0   | 0     | 0   | 100  | 0   | 0    | 0    | 0    | 0     | 0     | 0   | 0    | 0   |

Table 3: Percentages of translation mappings of parts of speech.

|       |           | acl | advcl | advmod | amod | appos | ccomp | compound | conj | fixed | flat | nmod | nsbj | nummod | obj | obl | parataxis | xcomp | Collapsed | Other | MCOP (%) | MCOP              |  |
|-------|-----------|-----|-------|--------|------|-------|-------|----------|------|-------|------|------|------|--------|-----|-----|-----------|-------|-----------|-------|----------|-------------------|--|
| En-Ru | acl       | 151 | 2     | 1      | 5    | 1     | 2     | 0        | 1    | 0     | 0    | 27   | 7    | 0      | 5   | 3   | 3         | 13    | 2         | 89    | 15       | nmod+acl          |  |
|       | advcl     | 11  | 68    | 2      | 0    | 0     | 9     | 0        | 11   | 0     | 0    | 2    | 0    | 0      | 1   | 22  | 4         | 2     | 1         | 79    | 5        | advcl+xcomp       |  |
|       | advmod    | 0   | 0     | 332    | 11   | 0     | 0     | 0        | 1    | 0     | 1    | 4    | 0    | 1      | 1   | 16  | 2         | 2     | 27        | 129   | 11       | advmod+nummod     |  |
|       | amod      | 29  | 0     | 8      | 893  | 4     | 4     | 0        | 1    | 0     | 5    | 60   | 4    | 7      | 1   | 3   | 0         | 0     | 57        | 77    | 18       | det               |  |
|       | appos     | 0   | 0     | 0      | 0    | 43    | 0     | 0        | 1    | 0     | 15   | 21   | 1    | 1      | 0   | 0   | 1         | 0     | 1         | 35    | 7        | nmod+flat         |  |
|       | ccomp     | 1   | 2     | 1      | 0    | 0     | 48    | 0        | 0    | 0     | 1    | 0    | 0    | 0      | 1   | 0   | 6         | 6     | 0         | 32    | 11       | ccomp+xcomp       |  |
|       | compound  | 0   | 0     | 2      | 244  | 7     | 0     | 4        | 3    | 0     | 48   | 173  | 0    | 10     | 2   | 4   | 0         | 0     | 153       | 97    | 22       | nmod+nmod         |  |
|       | conj      | 0   | 2     | 0      | 1    | 0     | 0     | 0        | 387  | 1     | 1    | 0    | 0    | 1      | 0   | 1   | 1         | 0     | 5         | 108   | 10       | conj+conj         |  |
|       | fixed     | 0   | 0     | 0      | 0    | 0     | 0     | 0        | 0    | 0     | 2    | 1    | 0    | 0      | 0   | 0   | 0         | 0     | 9         | 1     | 1        | nmod+flat         |  |
|       | flat      | 0   | 0     | 0      | 0    | 0     | 0     | 2        | 0    | 0     | 154  | 13   | 0    | 0      | 0   | 1   | 0         | 0     | 8         | 19    | 7        | flat+flat         |  |
|       | nmod      | 4   | 1     | 11     | 40   | 6     | 1     | 0        | 5    | 0     | 10   | 632  | 5    | 7      | 6   | 31  | 0         | 0     | 5         | 309   | 67       | det               |  |
|       | nsbj      | 1   | 1     | 1      | 1    | 0     | 0     | 0        | 1    | 0     | 0    | 14   | 829  | 0      | 22  | 26  | 0         | 0     | 3         | 261   | 48       | nsbj+xcomp        |  |
|       | nummod    | 0   | 0     | 1      | 10   | 0     | 0     | 0        | 0    | 0     | 1    | 3    | 0    | 153    | 0   | 1   | 0         | 0     | 14        | 4     | 1        | compound+nummod   |  |
|       | obj       | 1   | 0     | 4      | 4    | 0     | 1     | 0        | 0    | 0     | 0    | 58   | 27   | 0      | 393 | 62  | 0         | 3     | 25        | 106   | 26       | iobj              |  |
|       | obl       | 0   | 5     | 44     | 2    | 0     | 0     | 0        | 3    | 0     | 0    | 38   | 17   | 0      | 27  | 463 | 3         | 2     | 10        | 311   | 67       | iobj              |  |
|       | parataxis | 0   | 1     | 0      | 0    | 0     | 1     | 0        | 5    | 0     | 0    | 0    | 0    | 0      | 0   | 0   | 41        | 0     | 0         | 22    | 2        | acl+obl           |  |
|       | xcomp     | 0   | 5     | 9      | 0    | 0     | 7     | 0        | 2    | 0     | 0    | 1    | 3    | 0      | 3   | 15  | 0         | 91    | 4         | 40    | 15       | iobj              |  |
| En-Fr | acl       | 104 | 4     | 1      | 13   | 3     | 52    | 0        | 3    | 0     | 0    | 12   | 1    | 0      | 4   | 3   | 0         | 24    | 2         | 80    | 8        | acl+xcomp         |  |
|       | advcl     | 2   | 96    | 2      | 0    | 0     | 19    | 0        | 4    | 0     | 0    | 0    | 0    | 0      | 0   | 16  | 4         | 5     | 0         | 70    | 9        | xcomp+advcl       |  |
|       | advmod    | 1   | 0     | 321    | 7    | 2     | 0     | 0        | 1    | 2     | 0    | 8    | 1    | 0      | 6   | 17  | 0         | 6     | 31        | 108   | 18       | advmod+xcomp      |  |
|       | amod      | 1   | 0     | 9      | 854  | 3     | 14    | 5        | 2    | 0     | 0    | 97   | 3    | 3      | 1   | 5   | 0         | 0     | 61        | 80    | 16       | det               |  |
|       | appos     | 0   | 0     | 0      | 2    | 88    | 1     | 0        | 1    | 0     | 0    | 7    | 0    | 0      | 0   | 1   | 0         | 0     | 0         | 27    | 4        | appos+nmod        |  |
|       | ccomp     | 0   | 1     | 0      | 0    | 0     | 51    | 0        | 0    | 0     | 0    | 0    | 0    | 0      | 2   | 0   | 5         | 11    | 0         | 28    | 10       | ccomp+xcomp       |  |
|       | compound  | 0   | 0     | 1      | 143  | 32    | 0     | 47       | 5    | 0     | 21   | 300  | 1    | 12     | 4   | 5   | 0         | 2     | 102       | 46    | 10       | nmod+nmod         |  |
|       | conj      | 1   | 2     | 0      | 0    | 2     | 2     | 0        | 405  | 0     | 0    | 3    | 0    | 0      | 1   | 0   | 6         | 1     | 7         | 96    | 9        | nmod+conj         |  |
|       | fixed     | 0   | 0     | 0      | 1    | 1     | 0     | 0        | 0    | 0     | 1    | 0    | 0    | 0      | 0   | 0   | 0         | 0     | 1         | 2     | 1        | appos+nummod      |  |
|       | flat      | 0   | 0     | 0      | 5    | 32    | 0     | 5        | 0    | 0     | 140  | 4    | 0    | 8      | 0   | 0   | 0         | 0     | 8         | 15    | 7        | appos+flat        |  |
|       | nmod      | 0   | 0     | 6      | 17   | 3     | 0     | 1        | 2    | 0     | 1    | 702  | 4    | 12     | 13  | 34  | 0         | 1     | 15        | 253   | 37       | nmod+nmod         |  |
|       | nsbj      | 4   | 0     | 1      | 0    | 1     | 2     | 0        | 0    | 0     | 0    | 6    | 870  | 0      | 12  | 8   | 0         | 0     | 0         | 197   | 59       | nsbj+xcomp        |  |
|       | nummod    | 0   | 0     | 0      | 3    | 3     | 0     | 0        | 1    | 0     | 0    | 41   | 0    | 169    | 0   | 1   | 0         | 0     | 7         | 12    | 7        | det               |  |
|       | obj       | 2   | 1     | 2      | 0    | 1     | 1     | 1        | 1    | 0     | 0    | 37   | 8    | 0      | 520 | 55  | 0         | 7     | 21        | 63    | 13       | obj+nmod          |  |
|       | obl       | 2   | 4     | 22     | 3    | 0     | 1     | 0        | 1    | 0     | 0    | 23   | 9    | 0      | 57  | 640 | 0         | 7     | 7         | 195   | 27       | obl+nmod          |  |
|       | parataxis | 1   | 0     | 1      | 0    | 0     | 4     | 0        | 9    | 0     | 0    | 0    | 0    | 0      | 0   | 0   | 37        | 0     | 0         | 23    | 2        | obl+parataxis     |  |
|       | xcomp     | 0   | 6     | 6      | 0    | 1     | 3     | 0        | 0    | 0     | 0    | 1    | 1    | 0      | 6   | 8   | 0         | 141   | 7         | 18    | 3        | obj+amod          |  |
| En-Zh | acl       | 96  | 2     | 1      | 5    | 1     | 0     | 6        | 0    | 0     | 0    | 3    | 25   | 0      | 6   | 3   | 0         | 3     | 2         | 143   | 8        | obj+advcl         |  |
|       | advcl     | 1   | 44    | 1      | 0    | 0     | 4     | 0        | 0    | 0     | 1    | 0    | 0    | 0      | 1   | 3   | 0         | 34    | 0         | 116   | 14       | dep               |  |
|       | advmod    | 4   | 8     | 227    | 7    | 0     | 2     | 7        | 0    | 0     | 0    | 2    | 5    | 1      | 15  | 26  | 0         | 13    | 52        | 227   | 19       | advmod+obj        |  |
|       | amod      | 46  | 1     | 20     | 194  | 1     | 0     | 351      | 0    | 0     | 0    | 56   | 28   | 38     | 5   | 8   | 0         | 1     | 160       | 206   | 35       | compound+compound |  |
|       | appos     | 1   | 0     | 0      | 0    | 53    | 0     | 9        | 2    | 0     | 2    | 5    | 2    | 0      | 0   | 0   | 0         | 1     | 3         | 29    | 2        | compound+compound |  |
|       | ccomp     | 0   | 1     | 2      | 0    | 0     | 37    | 0        | 0    | 0     | 0    | 0    | 0    | 0      | 0   | 0   | 0         | 5     | 0         | 54    | 4        | ccomp+advcl       |  |
|       | compound  | 2   | 0     | 0      | 15   | 3     | 0     | 317      | 4    | 0     | 14   | 26   | 9    | 1      | 2   | 3   | 0         | 0     | 250       | 109   | 64       | compound+compound |  |
|       | conj      | 2   | 51    | 0      | 0    | 0     | 1     | 7        | 225  | 0     | 1    | 1    | 0    | 0      | 0   | 0   | 0         | 0     | 10        | 200   | 23       | dep               |  |
|       | fixed     | 0   | 0     | 0      | 0    | 1     | 0     | 0        | 0    | 0     | 1    | 1    | 0    | 0      | 0   | 0   | 0         | 0     | 60        | 1     | 1        | appos+flat        |  |
|       | flat      | 0   | 0     | 0      | 0    | 18    | 0     | 20       | 2    | 0     | 99   | 0    | 0    | 0      | 0   | 0   | 0         | 0     | 19        | 53    | 39       | appos+flat        |  |
|       | nmod      | 18  | 0     | 4      | 13   | 6     | 1     | 200      | 4    | 0     | 3    | 259  | 38   | 13     | 44  | 37  | 0         | 0     | 31        | 427   | 29       | compound+compound |  |
|       | nsbj      | 2   | 2     | 5      | 0    | 0     | 1     | 5        | 0    | 0     | 0    | 5    | 674  | 0      | 31  | 14  | 0         | 1     | 1         | 391   | 92       | nsbj+advcl        |  |
|       | nummod    | 0   | 0     | 0      | 1    | 0     | 0     | 0        | 0    | 0     | 1    | 0    | 0    | 74     | 0   | 0   | 0         | 0     | 39        | 57    | 41       | nummod+clf        |  |
|       | obj       | 4   | 4     | 1      | 0    | 1     | 7     | 6        | 0    | 0     | 0    | 3    | 6    | 2      | 396 | 29  | 0         | 7     | 26        | 180   | 50       | ccomp+nsbj        |  |
|       | obl       | 4   | 6     | 21     | 0    | 0     | 13    | 8        | 0    | 0     | 0    | 8    | 34   | 0      | 138 | 159 | 0         | 18    | 14        | 425   | 49       | obj+advcl         |  |
|       | parataxis | 0   | 2     | 1      | 0    | 0     | 6     | 0        | 0    | 0     | 0    | 0    | 0    | 0      | 0   | 0   | 0         | 1     | 0         | 71    | 18       | dep               |  |
|       | xcomp     | 1   | 5     | 11     | 0    | 1     | 24    | 0        | 0    | 0     | 0    | 0    | 1    | 0      | 9   | 2   | 0         | 42    | 5         | 62    | 22       | aux               |  |
| En-Ko | acl       | 73  | 4     | 3      | 0    | 0     | 0     | 4        | 0    | 0     | 0    | 2    | 2    | 0      | 4   | 0   | 0         | 0     | 0         | 106   | 7        | acl+nsbj+acl      |  |
|       | advcl     | 2   | 24    | 9      | 0    | 0     | 0     | 0        | 0    | 0     | 1    | 0    | 2    | 0      | 0   | 0   | 0         | 0     | 0         | 95    | 8        | advmod+acl        |  |
|       | advmod    | 5   | 9     | 169    | 4    | 0     | 0     | 13       | 0    | 1     | 0    | 1    | 5    | 1      | 4   | 0   | 0         | 0     | 14        | 168   | 30       | aux               |  |
|       | amod      | 68  | 1     | 20     | 106  | 0     | 0     | 339      | 0    | 0     | 5    | 69   | 16   | 16     | 3   | 0   | 0         | 0     | 87        | 168   | 41       | det               |  |
|       | appos     | 25  | 1     | 0      | 0    | 7     | 0     | 16       | 0    | 0     | 3    | 2    | 2    | 0      | 0   | 0   | 0         | 0     | 0         | 37    | 4        | acl+compound      |  |
|       | ccomp     | 0   | 18    | 2      | 0    | 0     | 1     | 0        | 0    | 0     | 1    | 0    | 0    | 0      | 0   | 0   | 0         | 0     | 0         | 39    | 5        | advcl+advcl       |  |
|       | compound  | 2   | 1     | 4      | 0    | 0     | 0     | 354      | 7    | 0     | 21   | 14   | 4    | 2      | 4   | 0   | 0         | 0     | 143       | 67    | 13       | compound+compound |  |
|       | conj      | 2   | 47    | 2      | 0    | 0     | 2     | 201      | 0    | 3     | 2    | 0    | 0    | 0      | 1   | 0   | 0         | 0     | 2         | 118   | 7        | conj+compound     |  |
|       | fixed     | 0   | 0     | 0      | 0    | 0     | 2     | 0        | 0    | 0     | 0    | 0    | 0    | 0      | 0   | 0   | 0         | 0     | 3         | 2     | 1        | compound+compound |  |
|       | flat      | 6   | 0     | 0      | 0    | 0     | 0     | 28       | 0    | 0     | 101  | 1    | 1    | 0      | 0   | 0   | 0         | 0     | 9         | 22    | 5        | compound+flat     |  |
|       | nmod      | 10  | 1     | 26     | 3    | 5     | 0     | 139      | 4    | 0     | 3    | 207  | 21   | 6      | 12  | 4   | 0         | 0     | 8         | 366   | 51       | acl+advmod        |  |
|       | nsbj      | 5   | 1     | 18     | 1    | 0     | 0     | 7        | 0    | 0     | 0    | 2    | 374  | 0      | 23  | 0   | 0         | 0     | 1         | 358   | 55       | nsbj+advcl        |  |
|       | nummod    | 0   | 0     | 2      | 0    | 0     | 0     | 3        | 0    | 0     | 0    | 0    | 0    | 100    | 0   | 0   | 0         | 0     | 1         | 40    | 14       | nummod+nmod       |  |
|       | obj       | 5   | 5     | 30     | 0    | 0     | 0     | 16       | 0    | 0     | 0    | 2    | 21   | 0      | 249 | 0   | 0         | 0     | 11        | 143   | 27       | aux+obj           |  |
|       | obl       | 5   | 7     | 210    | 0    | 0     | 0     | 12       | 0    | 0     | 0    | 2    | 24   | 0      | 35  | 2   | 0         | 0     | 4         | 350   | 25       | advmod+compound   |  |
|       | parataxis | 1   | 9     | 0      | 0    | 0     | 0     | 0        | 0    | 0     | 0    | 0    | 0    | 0      | 0   | 0   | 0         | 0     | 0         | 33    | 5        | advcl+advcl       |  |
|       | xcomp     | 3   | 12    | 17     | 0    | 0     | 9     | 9        | 0    | 0     | 0    | 0    | 1    | 0      | 7   | 0   | 0         | 0     | 2         | 61    | 11       | aux               |  |
| En-Jp | acl       | 23  | 4     | 0      | 0    | 0     | 0     | 1        | 0    | 0     | 0    | 5    | 1    | 0      | 0   | 0   | 0         | 0     | 0         | 28    | 2        | acl+advcl         |  |
|       | advcl     | 0   | 3     | 0      | 0    | 0     | 0     | 1        | 0    | 0     | 0    | 0    | 0    | 0      | 1   | 0   | 0         | 0     | 0         | 5     | 1        | nsbj+advcl        |  |
|       | advmod    | 1   | 3     | 20     | 2    | 0     | 1     | 3        | 0    | 0     | 0    | 3    | 1    | 3      | 2   | 3   | 0         | 0     | 9         | 67    | 10       | aux               |  |
|       | amod      | 34  | 2     | 3      | 26   | 0     | 0     | 75       | 0    | 0     | 0    | 84   | 2    | 4      | 4   | 1   | 0         | 0     | 102       | 57    | 9        | compound+compound |  |
|       | appos     | 1   | 0     | 0      | 0    | 9     | 0     | 11       | 0    | 0     | 0    | 10   | 0    | 0      | 0   | 0   | 0         | 0     | 1         | 16    | 4        | nmod+nmod         |  |
|       | ccomp     | 1   | 0     | 0      | 0    | 0     | 2     | 0        | 0    | 0     | 0    | 0    | 0    | 0      | 0   | 0   | 0         | 0     | 0         | 8     | 1        | aux               |  |
|       | compound  | 1   | 0     | 0      | 1    | 0     | 0     | 116      | 0    | 0     | 0    | 54   | 0    | 0      | 1   | 0   | 0         | 0     | 124       | 30    | 8        | compound+compound |  |
|       | conj      | 2   | 11    | 0      | 0    | 0     | 0     | 0        | 0    | 0     | 0    | 41   | 1    | 0      | 0   | 0   | 1         | 0     | 2         | 74    | 18       | nmod+nmod         |  |
|       | fixed     | 0   | 0     | 0      | 0    | 0     | 0     | 0        | 0    | 0     | 0    | 0    | 0    | 0      | 0   | 0   | 0         | 0     | 21        | 0     | 0        | acl+acl           |  |
|       | flat      | 0   | 0     | 0      | 0    | 0     | 0     | 19       | 0    | 0     | 0    | 34   | 0    | 0      | 0   | 0   | 0         | 0     | 13        | 20    | 9        | nmod+nmod         |  |
|       | nmod      | 0   | 0     | 0      | 0    | 2     | 0     | 31       | 0    | 0     | 0    | 188  | 1    | 0      | 5   | 3   | 0         |       |           |       |          |                   |  |

|                  | <b>Ko</b> | <b>Jp</b> | <b>Zh</b> | <b>Ru</b> | <b>Fr</b> |
|------------------|-----------|-----------|-----------|-----------|-----------|
| <b>acl</b>       | 4.769242  | 3.830784  | 5.060668  | 3.652101  | 4.050027  |
| <b>advcl</b>     | 5.310528  | 2.846439  | 4.835997  | 4.504237  | 3.745798  |
| <b>advmod</b>    | 4.089253  | 5.092975  | 4.555394  | 2.848869  | 2.767038  |
| <b>amod</b>      | 3.551876  | 3.268781  | 3.642666  | 1.634234  | 1.709718  |
| <b>appos</b>     | 3.880474  | 3.21408   | 3.409938  | 3.297443  | 2.135566  |
| <b>aux</b>       | 3.087929  | 2.565961  | 2.013037  | 1.157876  | 0.508315  |
| <b>case</b>      | 3.50321   | 1.988427  | 3.81068   | 2.219851  | 1.333314  |
| <b>cc</b>        | 3.062907  | 4.349407  | 3.109744  | 1.773011  | 1.736929  |
| <b>ccomp</b>     | 4.411585  | 3.277613  | 4.158406  | 2.994698  | 2.65771   |
| <b>compound</b>  | 2.309827  | 2.145895  | 2.503707  | 2.988854  | 2.821717  |
| <b>conj</b>      | 3.531517  | 4.126376  | 4.16811   | 2.144241  | 2.039554  |
| <b>cop</b>       | 2.272808  | 3.21288   | 2.217022  | 3.000973  | 1.584963  |
| <b>csubj</b>     | 3.251629  | 0.811278  | 3.386637  | 3.221252  | 2.879249  |
| <b>det</b>       | 3.107192  | 2.769522  | 2.989865  | 2.689149  | 2.197421  |
| <b>fixed</b>     | 1.842371  | 0         | 0.46229   | 1.35203   | 2.584963  |
| <b>flat</b>      | 2.128367  | 2.381739  | 2.39878   | 1.634478  | 1.932195  |
| <b>iobj</b>      | 2.321928  | NA        | 2.5       | 1.5       | 1.351644  |
| <b>mark</b>      | 2.96381   | 3.027169  | 4.024999  | 2.7912    | 2.142446  |
| <b>nmod</b>      | 4.971409  | 3.542603  | 5.006165  | 3.155123  | 2.795594  |
| <b>nsubj</b>     | 4.11521   | 4.069544  | 3.196435  | 2.319142  | 1.721087  |
| <b>nummod</b>    | 1.967499  | 1.946163  | 2.15335   | 1.120919  | 1.478528  |
| <b>obj</b>       | 3.488357  | 3.077944  | 3.095776  | 2.679303  | 1.934877  |
| <b>obl</b>       | 5.265461  | 4.585266  | 5.601495  | 3.664774  | 2.746977  |
| <b>parataxis</b> | 4.446289  | 3.321928  | 4.897466  | 2.711151  | 3.091764  |
| <b>xcomp</b>     | 4.609696  | 3.039149  | 3.912925  | 3.054541  | 1.997426  |
| <b>Average</b>   | 3.53      | 3.02      | 3.48      | 2.56      | 2.24      |

Table 5: Translation entropies of UD relations.

|                   |                                                                                                                                                |
|-------------------|------------------------------------------------------------------------------------------------------------------------------------------------|
| Input             | Input dropout rate: 0.3<br>POS tag embedding dimension: 100                                                                                    |
| Word-level BiLSTM | LSTM size: 400<br># LSTM layers: 3<br>Recurrent dropout rate: 0.3<br>Use Highway Connection: Yes<br>Output dropout rate: 0.3                   |
| MLP and Attention | Arc MLP size: 500<br>Label MLP size: 100<br># MLP layers: 1<br>Activation: ReLU<br>Dropout: 0.3                                                |
| MLP and Attention | Batch size: 128<br># Epochs: 100<br>Early stopping: 50<br>Adam (Kingma and Ba, 2014) lr: 0.001<br>Adam $\beta_1$ : 0.9<br>Adam $\beta_2$ : 0.9 |

Table 6: Hyper-parameters used in our zero-shot experiments.
