# Supplementary material
Source: ML conference proceedings conference paper supplement (https://aclanthology.org/2020.acl-main.109)
Supplement: Dataset [file combined.xlsx]

## Sheet: Sheet1
dataset	label	transfer	en_zero_shot_f	lang_super_gsd_f	en_ewt_super_f	en_pud_f
fr_gsd	acl	31.8	0.737888	0.843712	0.813656	0.829966
fr_gsd	advcl	39.9	0.636518	0.814105	0.787576	0.739782
fr_gsd	advmod	58	0.744973	0.919862	0.907304	0.883798
fr_gsd	amod	73.5	0.798852	0.959565	0.945957	0.962927
fr_gsd	appos	68.3	0.47871	0.736273	0.513912	0.687406
fr_gsd	ccomp	50.5	0.625861	0.868644	0.854073	0.701915
fr_gsd	compound	7.3	0		0.848795	0.874617
fr_gsd	conj	75	0.759387	0.844429	0.79919	0.882225
fr_gsd	fixed	0	0.0484497	0.849015	0.949951	0.759068
fr_gsd	flat	68.3	0.748625	0.929255	0.858877	0.753016
fr_gsd	nmod	64.6	0.694866	0.858658	0.879724	0.882316
fr_gsd	nsubj	74.9	0.807566	0.963831	0.966332	0.963084
fr_gsd	nummod	73.2	0.714734	0.965633	0.841807	0.882019
fr_gsd	obj	70.9	0.807783	0.930539	0.950089	0.954919
fr_gsd	obl	60.4	0.653595	0.848852	0.851719	0.861848
fr_gsd	parataxis	45.3	0.341353	0.380195	0.534637	0.446172
fr_gsd	xcomp	61.7	0.694309	0.915467	0.908079	0.851895
fr_pud	acl	31.8	0.698485	0.818172	0.813656	0.829966
fr_pud	advcl	39.9	0.520586	0.66484	0.787576	0.739782
fr_pud	advmod	58	0.786315	0.821061	0.907304	0.883798
fr_pud	amod	73.5	0.846983	0.975135	0.945957	0.962927
fr_pud	appos	68.3	0.585064	0.733982	0.513912	0.687406
fr_pud	ccomp	50.5	0.53739	0.625406	0.854073	0.701915
fr_pud	compound	7.3	0.342484	0	0.848795	0.874617
fr_pud	conj	75	0.797623	0.870492	0.79919	0.882225
fr_pud	fixed	0	0.14749	0.48009	0.949951	0.759068
fr_pud	flat	68.3	0.849979	0.9043	0.858877	0.753016
fr_pud	nmod	64.6	0.769383	0.850116	0.879724	0.882316
fr_pud	nsubj	74.9	0.857751	0.969771	0.966332	0.963084
fr_pud	nummod	73.2	0.762691	0.907456	0.841807	0.882019
fr_pud	obj	70.9	0.831719	0.907342	0.950089	0.954919
fr_pud	obl	60.4	0.710894	0.801797	0.851719	0.861848
fr_pud	parataxis	45.3	0.464946	0.398826	0.534637	0.446172
fr_pud	xcomp	61.7	0.66162	0.823333	0.908079	0.851895
ja_gsd	acl	37.3	0.0167681	0.906271	0.813656	0.829966
ja_gsd	advcl	9.5	0.00450375	0.78979	0.787576	0.739782
ja_gsd	advmod	11.1	0.46501	0.831458	0.907304	0.883798
ja_gsd	amod	9.5	0.258616	0.951615	0.945957	0.962927
ja_gsd	appos	6.2	0		0.513912	0.687406
ja_gsd	ccomp	11.1	0.0187793	0.927726	0.854073	0.701915
ja_gsd	compound	50	0.680577	0.959754	0.848795	0.874617
ja_gsd	conj	0	0		0.79919	0.882225
ja_gsd	fixed		0	0.964912	0.949951	0.759068
ja_gsd	flat	0	0		0.858877	0.753016
ja_gsd	nmod	44.8	0.0187995	0.88093	0.879724	0.882316
ja_gsd	nsubj	33.8	0.188047	0.870157	0.966332	0.963084
ja_gsd	nummod	56.5	0.587864	0.964006	0.841807	0.882019
ja_gsd	obj	41.8	0.00811248	0.98351	0.950089	0.954919
ja_gsd	obl	32.2	0.0581299	0.854398	0.851719	0.861848
ja_gsd	parataxis	0	0		0.534637	0.446172
ja_gsd	xcomp	0	0		0.908079	0.851895
ja_pud	acl	37.3	0.0204699	0.876941	0.813656	0.829966
ja_pud	advcl	9.5	0.00465352	0.809101	0.787576	0.739782
ja_pud	advmod	11.1	0.365997	0.828055	0.907304	0.883798
ja_pud	amod	9.5	0.264471	0.90915	0.945957	0.962927
ja_pud	appos	6.2	0.241866	0	0.513912	0.687406
ja_pud	ccomp	11.1	0.0030581	0.785011	0.854073	0.701915
ja_pud	compound	50	0.621577	0.960631	0.848795	0.874617
ja_pud	conj	0	0		0.79919	0.882225
ja_pud	fixed		0.00516796	0.982922	0.949951	0.759068
ja_pud	flat	0	0		0.858877	0.753016
ja_pud	nmod	44.8	0.0228656	0.856817	0.879724	0.882316
ja_pud	nsubj	33.8	0.207309	0.841468	0.966332	0.963084
ja_pud	nummod	56.5	0.696959	0.976991	0.841807	0.882019
ja_pud	obj	41.8	0.0100089	0.969278	0.950089	0.954919
ja_pud	obl	32.2	0.0590019	0.826551	0.851719	0.861848
ja_pud	parataxis	0	0		0.534637	0.446172
ja_pud	xcomp	0	0		0.908079	0.851895
ko_gsd	acl	32.8	0.016611	0.802904	0.813656	0.829966
ko_gsd	advcl	15.6	0.00824692	0.688101	0.787576	0.739782
ko_gsd	advmod	39.1	0.435227	0.863024	0.907304	0.883798
ko_gsd	amod	12.9	0.413376	0.933725	0.945957	0.962927
ko_gsd	appos	3.4	0.34589	0.845792	0.513912	0.687406
ko_gsd	ccomp	0	0.0273205	0.650299	0.854073	0.701915
ko_gsd	compound	69.5	0		0.848795	0.874617
ko_gsd	conj	49.3	0.153464	0.764306	0.79919	0.882225
ko_gsd	fixed	0	0	0.666667	0.949951	0.759068
ko_gsd	flat	62	0.0196862	0.902009	0.858877	0.753016
ko_gsd	nmod	24.4	0	0.727272	0.879724	0.882316
ko_gsd	nsubj	40.2	0.26173	0.860078	0.966332	0.963084
ko_gsd	nummod	71.3	0.441546	0.747452	0.841807	0.882019
ko_gsd	obj	47.7	0.0408929	0.889538	0.950089	0.954919
ko_gsd	obl	0.3	0.0011655	0.899139	0.851719	0.861848
ko_gsd	parataxis	0	0		0.534637	0.446172
ko_gsd	xcomp	0	0		0.908079	0.851895
ko_pud	acl	32.8	0.017427	0.294408	0.813656	0.829966
ko_pud	advcl	15.6	0.00886807	0.311282	0.787576	0.739782
ko_pud	advmod	39.1	0.188341	0.276813	0.907304	0.883798
ko_pud	amod	12.9	0.302621	0.425999	0.945957	0.962927
ko_pud	appos	3.4	0.215417	0.494572	0.513912	0.687406
ko_pud	ccomp	0	0	0.0344679	0.854073	0.701915
ko_pud	compound	69.5	0.422136	0	0.848795	0.874617
ko_pud	conj	49.3	0.368873	0.358373	0.79919	0.882225
ko_pud	fixed	0	0	0.361905	0.949951	0.759068
ko_pud	flat	62	0.513707	0.115901	0.858877	0.753016
ko_pud	nmod	24.4	0.134161	0.00448534	0.879724	0.882316
ko_pud	nsubj	40.2	0.169551	0.418267	0.966332	0.963084
ko_pud	nummod	71.3	0.652817	0.428663	0.841807	0.882019
ko_pud	obj	47.7	0.0348717	0.470626	0.950089	0.954919
ko_pud	obl	0.3	0.0197151	0	0.851719	0.861848
ko_pud	parataxis	0	0		0.534637	0.446172
ko_pud	xcomp	0	0		0.908079	0.851895
ru_gsd	acl	42.4	0.527942	0.749766	0.813656	0.829966
ru_gsd	advcl	27.9	0.635265	0.729345	0.787576	0.739782
ru_gsd	advmod	57.4	0.686438	0.856567	0.907304	0.883798
ru_gsd	amod	77.2	0.854026	0.974825	0.945957	0.962927
ru_gsd	appos	34.2	0.257745	0.73885	0.513912	0.687406
ru_gsd	ccomp	46.9	0.525616	0.740053	0.854073	0.701915
ru_gsd	compound	0.7	0.021601	0.347786	0.848795	0.874617
ru_gsd	conj	69.7	0.609638	0.800386	0.79919	0.882225
ru_gsd	fixed	0	0.113182	0.692932	0.949951	0.759068
ru_gsd	flat	78.6	0.549668	0.924085	0.858877	0.753016
ru_gsd	nmod	56.4	0.25966	0.836934	0.879724	0.882316
ru_gsd	nsubj	65.2	0.584552	0.920667	0.966332	0.963084
ru_gsd	nummod	87.2	0.855717	0.940363	0.841807	0.882019
ru_gsd	obj	53.4	0.519916	0.839579	0.950089	0.954919
ru_gsd	obl	47.7	0.661715	0.843753	0.851719	0.861848
ru_gsd	parataxis	46.2	0.304316	0.405326	0.534637	0.446172
ru_gsd	xcomp	38.9	0.599282	0.821927	0.908079	0.851895
ru_pud	acl	42.4	0.654506	0.777778	0.813656	0.829966
ru_pud	advcl	27.9	0.556253	0.618197	0.787576	0.739782
ru_pud	advmod	57.4	0.731794	0.819546	0.907304	0.883798
ru_pud	amod	77.2	0.895657	0.957406	0.945957	0.962927
ru_pud	appos	34.2	0.190397	0.361523	0.513912	0.687406
ru_pud	ccomp	46.9	0.57161	0.76807	0.854073	0.701915
ru_pud	compound	0.7	0.00478909	0.11	0.848795	0.874617
ru_pud	conj	69.7	0.73009	0.839195	0.79919	0.882225
ru_pud	fixed	0	0.0344019	0.491705	0.949951	0.759068
ru_pud	flat	78.6	0.472482	0.63083	0.858877	0.753016
ru_pud	nmod	56.4	0.306545	0.808206	0.879724	0.882316
ru_pud	nsubj	65.2	0.763081	0.938647	0.966332	0.963084
ru_pud	nummod	87.2	0.868483	0.907283	0.841807	0.882019
ru_pud	obj	53.4	0.631236	0.877611	0.950089	0.954919
ru_pud	obl	47.7	0.668729	0.783366	0.851719	0.861848
ru_pud	parataxis	46.2	0.231895	0.492889	0.534637	0.446172
ru_pud	xcomp	38.9	0.699782	0.757124	0.908079	0.851895
zh_gsd	acl	30.5	0.0124198	0.857072	0.813656	0.829966
zh_gsd	advcl	18.3	0.030326	0.652277	0.787576	0.739782
zh_gsd	advmod	38.7	0.358777	0.851828	0.907304	0.883798
zh_gsd	amod	20.3	0.507513	0.828524	0.945957	0.962927
zh_gsd	appos	52.2	0.22516	0.797732	0.513912	0.687406
zh_gsd	ccomp	34.4	0.236322	0.647188	0.854073	0.701915
zh_gsd	compound	60.2	0.0252122	0.982431	0.848795	0.874617
zh_gsd	conj	47.3	0.49815	0.840801	0.79919	0.882225
zh_gsd	fixed	0			0.949951	0.759068
zh_gsd	flat	50.5	0.670285	0.950239	0.858877	0.753016
zh_gsd	nmod	21.6	0.127157	0.872537	0.879724	0.882316
zh_gsd	nsubj	55.8	0.437664	0.820397	0.966332	0.963084
zh_gsd	nummod	55	0.70863	0.97766	0.841807	0.882019
zh_gsd	obj	56.7	0.499759	0.884524	0.950089	0.954919
zh_gsd	obl	17.8	0.258688	0.822583	0.851719	0.861848
zh_gsd	parataxis	0	0.161242	0.670001	0.534637	0.446172
zh_gsd	xcomp	20.6	0.207594	0.703616	0.908079	0.851895
zh_pud	acl	30.5	0.0216873	0.521597	0.813656	0.829966
zh_pud	advcl	18.3	0.0448131	0.560995	0.787576	0.739782
zh_pud	advmod	38.7	0.626145	0.672592	0.907304	0.883798
zh_pud	amod	20.3	0.624638	0.801547	0.945957	0.962927
zh_pud	appos	52.2	0.431107	0.688439	0.513912	0.687406
zh_pud	ccomp	34.4	0.301658	0.577306	0.854073	0.701915
zh_pud	compound	60.2	0.643795	0.00554652	0.848795	0.874617
zh_pud	conj	47.3	0.593216	0.774736	0.79919	0.882225
zh_pud	fixed	0	0	0	0.949951	0.759068
zh_pud	flat	50.5	0.530774	0.717488	0.858877	0.753016
zh_pud	nmod	21.6	0.420282	0.267507	0.879724	0.882316
zh_pud	nsubj	55.8	0.521912	0.777656	0.966332	0.963084
zh_pud	nummod	55	0.746358	0.95451	0.841807	0.882019
zh_pud	obj	56.7	0.539902	0.805662	0.950089	0.954919
zh_pud	obl	17.8	0.305343	0.666048	0.851719	0.861848
zh_pud	parataxis	0	0.00143988	0.0116233	0.534637	0.446172
zh_pud	xcomp	20.6	0.241948	0.578429	0.908079	0.851895
zh-hk	acl	30.5	0.0711961	0.354538	0.813656	0.829966
zh-hk	advcl	18.3	0.269419	0.246729	0.787576	0.739782
zh-hk	advmod	38.7	0.747961	0.664431	0.907304	0.883798
zh-hk	amod	20.3	0.672833	0.68319	0.945957	0.962927
zh-hk	appos	52.2	0.176869	0.234836	0.513912	0.687406
zh-hk	ccomp	34.4	0.489697	0.322804	0.854073	0.701915
zh-hk	compound	60.2	0.350836	0.00797573	0.848795	0.874617
zh-hk	conj	47.3	0.398247	0.367129	0.79919	0.882225
zh-hk	fixed	0			0.949951	0.759068
zh-hk	flat	50.5	0.177052	0.0828132	0.858877	0.753016
zh-hk	nmod	21.6	0.556972	0.249832	0.879724	0.882316
zh-hk	nsubj	55.8	0.73529	0.685866	0.966332	0.963084
zh-hk	nummod	55	0.655997	0.557847	0.841807	0.882019
zh-hk	obj	56.7	0.719198	0.738837	0.950089	0.954919
zh-hk	obl	17.8	0.38373	0.607426	0.851719	0.861848
zh-hk	parataxis	0	0.212334	0.225061	0.534637	0.446172
zh-hk	xcomp	20.6	0.352782	0.150279	0.908079	0.851895
